# Supplementary material for: Inhibition of Transglutaminase 2 as a Therapeutic Strategy in Celiac Disease—In Vitro Studies in Intestinal Cells and Duodenal Biopsies
Source: MDPI journal article supplement (doi:10.3390/ijms24054795), 2023-03-01
Supplement: s1 [file s1]

## Supplemental 1: Processing of confocal images of CD biopsies

For each patient, five representative images were obtained. Settings of the laser, the photomultiplier and the acquisition modes (Pixel dwell time 2.4, , 1024 pixels, pinhole 30  $\mu\text{m}$ ) were equally applied in all images. The following macro for thresholding of the intestinal lamina propria was used:

```
run("Duplicate...", " ");
run("Grays");
run("Enhance Contrast...", "saturated=0.01 normalize");
run("Minimum...", "radius=1");
run("Subtract Background...", "rolling=50 sliding");
setOption("ScaleConversions", true);
run("8-bit");
run("Auto Threshold", "method=Moments white");
run("Create Selection");
roiManager("Add")
```
